# Supplementary material
Source: Springer Nature journal article supplement (https://www.springermedizin.de/resource/supplementary/13075_2010_3220_MOESM1_ESM.pdf/9694004)
Supplement: MOESM1 [file 9694004]

|                                                                                                                                                                                                                                               | Randomized Trials           |                                                         |                                                                                                                                                                                                                                   | Open-label Extension Trials <sup>b</sup> | Patients With ≥1 Dose of TCZ <sup>c</sup><br>(Randomized + Open-label Extension Trials) |
|-----------------------------------------------------------------------------------------------------------------------------------------------------------------------------------------------------------------------------------------------|-----------------------------|---------------------------------------------------------|-----------------------------------------------------------------------------------------------------------------------------------------------------------------------------------------------------------------------------------|------------------------------------------|-----------------------------------------------------------------------------------------|
| 1                                                                                                                                                                                                                                             | N = 23<br>(MTX ≥8 weeks)    | • Weekly MTX + single-dose<br>10 mg/kg TCZ              | 8 wks                                                                                                                                                                                                                             | 8 mg/kg TCZ ± MTX/DMARDs<br>5 y          | n = 2263                                                                                |
| 2                                                                                                                                                                                                                                             | N = 673<br>(6-mos MTX free) | • MTX<br>• 8 mg/kg TCZ                                  | 24 wks                                                                                                                                                                                                                            |                                          |                                                                                         |
| 3                                                                                                                                                                                                                                             | N = 499<br>(TNF-IR)         | • Placebo<br>• 4 mg/kg TCZ + MTX<br>• 8 mg/kg TCZ + MTX | 24 wks                                                                                                                                                                                                                            |                                          |                                                                                         |
| 4                                                                                                                                                                                                                                             | N = 1220<br>(DMARD-IR)      | • Placebo<br>• 8 mg/kg TCZ + DMARDs                     | 24 wks                                                                                                                                                                                                                            |                                          |                                                                                         |
| 5                                                                                                                                                                                                                                             | N = 623<br>(DMARD-IR)       | • Placebo<br>• 4 mg/kg TCZ + MTX<br>• 8 mg/kg TCZ + MTX | 24 wks                                                                                                                                                                                                                            | 8 mg/kg TCZ + MTX<br>5 y                 | n = 597                                                                                 |
| 6                                                                                                                                                                                                                                             | N = 1196<br>(DMARD-IR)      | • Placebo<br>• 4 mg/kg TCZ + MTX<br>• 8 mg/kg TCZ + MTX | 2 yrs                                                                                                                                                                                                                             | 8 mg/kg TCZ + MTX<br>3-5 y               | n = 1149                                                                                |
| <b><u>ALL-CONTROL POPULATION (n = 4199)<sup>a</sup></u></b><br>774 patients initially randomized to 4 mg/kg TCZ<br>1870 patients initially randomized to 8 mg/kg TCZ<br>1555 patients initially randomized to control (MTX/DMARDs or placebo) |                             |                                                         | <b><u>ALL-EXPOSED POPULATION (n = 4009)</u></b><br>774 patients initially randomized to 4 mg/kg TCZ<br>1870 patients initially randomized to 8 mg/kg TCZ<br>1365 patients initially randomized to control (MTX/DMARDs or placebo) |                                          |                                                                                         |
